# Supplementary material for: A Larger Membrane Area Increases Cytokine Removal in Polymethyl Methacrylate Hemofilters
Source: MDPI journal article supplement (doi:10.3390/membranes12080811), 2022-08-22
Supplement: s1 [file s1]

| Time [min] |                | 5      | 15     | 30     | 45     | 60     | 90     | 120    | 180    | 185    | 195    | 210    | 225    | 240    | 270    | 300    | 360    |
|------------|----------------|--------|--------|--------|--------|--------|--------|--------|--------|--------|--------|--------|--------|--------|--------|--------|--------|
| CH-1.8W    | CBi<br>[pg/mL] | 4098.0 | 4052.3 | 2463.7 | 2090.3 | 1812.1 | 1183.3 | 984.7  | 650.4  | 7717.5 | 6082.2 | 4738.0 | 4076.3 | 3205.8 | 2362.1 | 1808.1 | 1074.5 |
|            | CL<br>[mL/min] | 34.1   | 41.1   | 25.9   | 19.8   | 24.5   | 16.8   | 14.9   | 13.1   | 29.1   | 25.3   | 23.8   | 26.3   | 25.4   | 20.7   | 15.2   | 2.8    |
| CH-1.0N    | CBi<br>[pg/mL] | 4756.8 | 3906.2 | 3134.9 | 2930.1 | 2441.0 | 1960.9 | 1496.5 | 1101.1 | 8303.0 | 6886.6 | 5769.1 | 5288.7 | 4769.0 | 3687.7 | 3011.2 | 2095.9 |
|            | CL<br>[mL/min] | 31.3   | 25.4   | 18.4   | 25.4   | 17.9   | 20.3   | 11.9   | 12.2   | 23.4   | 19.4   | 19.0   | 21.8   | 27.2   | 19.5   | 20.4   | 14.9   |

**Supplemental Table S1.** The concentration at the inlet side (CBi) and the change in IL-6 CL over time when using CH-1.0N and CH-1.8W. IL-6 was added again after 180 min to confirm the adsorption saturation limit of the membranes.
